# Supplementary material for: Resource partitioning among bat species in Peninsular Malaysia rice fields
Source: PeerJ. 2024 Jan 18;12:e16657. doi: 10.7717/peerj.16657 (PMC10800099; doi:10.7717/peerj.16657)
Supplement: Data S1 [file peerj-12-16657-s001.xlsx]

## Sheet: Female-rep.stages
Bat_species	Rep_stages	Insect_order	Percentage_frequency
T.melanopogon	Lactating	Lepidoptera	66.2115
T.melanopogon	Lactating	Coleoptera	13.0127
T.melanopogon	Lactating	Diptera	10.5781
T.melanopogon	Lactating	Hymenoptera	12.7357
T.melanopogon	Lactating	Hemiptera	9.54553
T.melanopogon	Lactating	Odonata	1.14599
T.melanopogon	Lactating	UnID	2.43158
H.larvatus	Non_repro	Lepidoptera	19.8179
H.larvatus	Non_repro	Coleoptera	66.8014
H.larvatus	Non_repro	Diptera	11.5705
H.larvatus	Non_repro	Lepidoptera	56.5999
H.larvatus	Non_repro	Coleoptera	22.3436
H.larvatus	Non_repro	Diptera	5.18227
H.larvatus	Non_repro	Hymenoptera	19.1143
H.larvatus	Non_repro	Hemiptera	11.9854
H.larvatus	Lactating	Lepidoptera	48.9367
H.larvatus	Lactating	Coleoptera	29.7729
H.larvatus	Lactating	Hymenoptera	21.146
H.larvatus	Lactating	Hemiptera	13.5375
R.coelophyllus	Lactating	Coleoptera	78.5147
R.coelophyllus	Lactating	Lepidoptera	11.4853
R.refulgens	Pregnant	Coleoptera	71.7222
R.refulgens	Pregnant	Diptera	18.2778
R.refulgens	Pregnant	Coleoptera	82.5512
R.refulgens	Pregnant	Diptera	7.44883
R.refulgens	Pregnant	Coleoptera	73.3507
R.refulgens	Pregnant	Diptera	16.6493
R.refulgens	Pregnant	Coleoptera	69.9832
R.refulgens	Pregnant	Diptera	20.0168
R.refulgens	Pregnant	Coleoptera	80.8563
R.refulgens	Pregnant	Diptera	9.14366
R.malayanus	Pregnant	Coleoptera	90
R.malayanus	Pregnant	Coleoptera	90
R.malayanus	Pregnant	Coleoptera	90
R.malayanus	Pregnant	Coleoptera	90
R.malayanus	Pregnant	Coleoptera	90
R.pusillus	Pregnant	Coleoptera	56.2918
R.pusillus	Pregnant	Diptera	5.12665
R.pusillus	Pregnant	Lepidoptera	33.2109
R.pusillus	Pregnant	Coleoptera	44.5791
R.pusillus	Pregnant	Diptera	12.3939
R.pusillus	Pregnant	Lepidoptera	42.7057
R.pusillus	Pregnant	Hemiptera	2.05001
R.pusillus	Pregnant	Coleoptera	46.1462
R.pusillus	Pregnant	Diptera	13.7931
R.pusillus	Pregnant	Lepidoptera	39.7231
R.pusillus	Pregnant	Hemiptera	5.88879
R.pusillus	Pregnant	Hymenoptera	3.72046
R.pusillus	Pregnant	Coleoptera	77.2628
R.pusillus	Pregnant	Diptera	11.4418
R.pusillus	Pregnant	Hemiptera	5.52183
R.pusillus	Pregnant	Coleoptera	80.645
R.pusillus	Pregnant	Diptera	9.35499
T.melanopogon	Post_lactating	Lepidoptera	67.1052
T.melanopogon	Post_lactating	Coleoptera	9.03208
T.melanopogon	Post_lactating	Diptera	10.6289
T.melanopogon	Post_lactating	Hymenoptera	15.8365
T.melanopogon	Post_lactating	Homoptera	1.32632
T.melanopogon	Post_lactating	Hemiptera	7.64106
T.melanopogon	Non_repro	Lepidoptera	66.6831
T.melanopogon	Non_repro	Coleoptera	11.1569
T.melanopogon	Non_repro	Diptera	13.319
T.melanopogon	Non_repro	Hymenoptera	12.3576
T.melanopogon	Non_repro	Homoptera	1.89242
T.melanopogon	Non_repro	Hemiptera	7.97847
H.larvatus	Non_repro	Lepidoptera	66.3661
H.larvatus	Non_repro	Diptera	19.1066
H.larvatus	Non_repro	Hemiptera	13.3828
H.larvatus	Non_repro	Lepidoptera	88.2144
H.larvatus	Non_repro	Coleoptera	1.26248
H.larvatus	Non_repro	Hemiptera	1.26248
H.larvatus	Lactating	Lepidoptera	75.9638
H.larvatus	Lactating	Coleoptera	14.0362
H.larvatus	Lactating	Lepidoptera	46.0842
H.larvatus	Lactating	Coleoptera	43.9158
R.coelophyllus	Lactating	Coleoptera	74.6896
R.coelophyllus	Lactating	Diptera	9.95413
R.coelophyllus	Lactating	Lepidoptera	2.55809
R.coelophyllus	Lactating	Hemiptera	11.2183
R.coelophyllus	Lactating	Coleoptera	79.3513
R.coelophyllus	Lactating	Diptera	10.6487
R.coelophyllus	Lactating	Coleoptera	74.0236
R.coelophyllus	Lactating	Diptera	15.3077
R.coelophyllus	Lactating	Hemiptera	4.46499
R.coelophyllus	Pregnant	Coleoptera	90
R.coelophyllus	Pregnant	Coleoptera	90
R.coelophyllus	Non_repro	Coleoptera	84.4437
R.coelophyllus	Non_repro	Diptera	5.55634
R.refulgens	Lactating	Coleoptera	90
R.refulgens	Lactating	Coleoptera	90
R.refulgens	Lactating	Coleoptera	90
R.refulgens	Lactating	Coleoptera	85.1431
R.refulgens	Lactating	Diptera	4.85686
R.malayanus	Lactating	Coleoptera	68.1191
R.malayanus	Lactating	Diptera	21.8809
R.malayanus	Lactating	Coleoptera	90
R.malayanus	Lactating	Coleoptera	90
R.pusillus	Lactating	Coleoptera	87.255
R.pusillus	Lactating	Diptera	2.74502
R.pusillus	Lactating	Coleoptera	90
R.pusillus	Lactating	Coleoptera	90
R.pusillus	Lactating	Coleoptera	90
R.pusillus	Lactating	Coleoptera	36.0157
R.pusillus	Lactating	Diptera	6.38005
R.pusillus	Lactating	Lepidoptera	53.2436
T.melanopogon	Post_lactating	Lepidoptera	69.6667
T.melanopogon	Post_lactating	Coleoptera	18.1472
T.melanopogon	Post_lactating	Diptera	7.14716
T.melanopogon	Post_lactating	Hemiptera	5.21321
T.melanopogon	Post_lactating	Lepidoptera	46.0472
T.melanopogon	Post_lactating	Coleoptera	41.0856
T.melanopogon	Post_lactating	Diptera	8.11649
T.melanopogon	Post_lactating	Hemiptera	9.95747
T.melanopogon	Non_repro	Lepidoptera	78.6419
T.melanopogon	Non_repro	Coleoptera	8.99633
T.melanopogon	Non_repro	Diptera	1.17651
T.melanopogon	Non_repro	Hemiptera	6.77383
T.melanopogon	Non_repro	Lepidoptera	62.8229
T.melanopogon	Non_repro	Coleoptera	24.3182
T.melanopogon	Non_repro	Diptera	7.88979
T.melanopogon	Non_repro	Hemiptera	8.16857
R.refulgens	Non_repro	Coleoptera	83.1842
R.refulgens	Non_repro	Diptera	6.81582
R.refulgens	Non_repro	Coleoptera	90
R.refulgens	Post_lactating	Coleoptera	86.8957
R.refulgens	Post_lactating	Diptera	3.10426
R.refulgens	Post_lactating	Coleoptera	44.6548
R.refulgens	Post_lactating	Diptera	4.45149
R.refulgens	Post_lactating	Lepidoptera	45
R.refulgens	Post_lactating	Coleoptera	84.3658
R.refulgens	Post_lactating	Diptera	5.63415
R.malayanus	Non_repro	Coleoptera	50.2652
R.malayanus	Non_repro	Lepidoptera	39.7336
R.pusillus	Post_lactating	Coleoptera	43.8308
R.pusillus	Post_lactating	Diptera	2.29244
R.pusillus	Post_lactating	Lepidoptera	46.0831
R.pusillus	Post_lactating	Coleoptera	43.3865
R.pusillus	Post_lactating	Diptera	7.39282
R.pusillus	Post_lactating	Lepidoptera	45.6641
R.pusillus	Post_lactating	Coleoptera	36.8699
R.pusillus	Post_lactating	Lepidoptera	53.1301
R.pusillus	Post_lactating	Coleoptera	43.5863
R.pusillus	Post_lactating	Diptera	5.43421
R.pusillus	Post_lactating	Lepidoptera	45
R.pusillus	Post_lactating	Hemiptera	7.19692
R.pusillus	Post_lactating	Coleoptera	84.4523
R.pusillus	Post_lactating	Diptera	5.54766
H.larvatus	Post_lactating	Lepidoptera	54.8647
H.larvatus	Post_lactating	Coleoptera	34.1599
H.larvatus	Post_lactating	Hemiptera	7.2494
H.larvatus	Post_lactating	Lepidoptera	82.4939
H.larvatus	Post_lactating	Coleoptera	6.70984
H.larvatus	Post_lactating	Hemiptera	3.34916
H.larvatus	Non_repro	Lepidoptera	79.1133
H.larvatus	Non_repro	Coleoptera	10.361
H.larvatus	Non_repro	Diptera	0.996235
H.larvatus	Non_repro	Hemiptera	3.1518
H.larvatus	Non_repro	Lepidoptera	41.3705
H.larvatus	Non_repro	Coleoptera	32.0493
H.larvatus	Non_repro	Diptera	3.44464
H.larvatus	Non_repro	Hymenoptera	19.2138
H.larvatus	Non_repro	Hemiptera	24.3253
R.coelophyllus	Non_repro	Coleoptera	81.4508
R.coelophyllus	Non_repro	Diptera	8.54921
R.refulgens	Post_lactating	Coleoptera	65.3227
R.refulgens	Post_lactating	Diptera	23.9771
R.refulgens	Post_lactating	Hemiptera	5.49637
R.malayanus	Post_lactating	Coleoptera	47.124
R.malayanus	Post_lactating	Diptera	42.876
R.malayanus	Post_lactating	Coleoptera	40.4063
R.malayanus	Post_lactating	Diptera	49.1066
R.malayanus	Post_lactating	Hymenoptera	5.25968
R.malayanus	Post_lactating	Coleoptera	52.1592
R.malayanus	Post_lactating	Diptera	14.7144
R.malayanus	Post_lactating	Hemiptera	32.6031
R.malayanus	Post_lactating	Odonata	8.43267
R.malayanus	Post_lactating	Coleoptera	68.5104
R.malayanus	Post_lactating	Diptera	15.7405
R.malayanus	Post_lactating	Hemiptera	14.2518
R.pusillus	Non_repro	Coleoptera	46.1033
R.pusillus	Non_repro	Diptera	1.56855
R.pusillus	Non_repro	Lepidoptera	43.8538
R.pusillus	Non_repro	Coleoptera	43.5394
R.pusillus	Non_repro	Lepidoptera	46.1462
R.pusillus	Non_repro	Hemiptera	4.2458
R.pusillus	Non_repro	Coleoptera	42.4831
R.pusillus	Non_repro	Diptera	3.56758
R.pusillus	Non_repro	Lepidoptera	47.2943
R.pusillus	Non_repro	Coleoptera	49.6539
R.pusillus	Non_repro	Diptera	6.10333
R.pusillus	Non_repro	Lepidoptera	39.587
R.pusillus	Non_repro	Hemiptera	2.36304
R.pusillus	Non_repro	Coleoptera	49.3956
R.pusillus	Non_repro	Diptera	11.0222
R.pusillus	Non_repro	Lepidoptera	38.4709
H.larvatus	Non_repro	Lepidoptera	36.9835
H.larvatus	Non_repro	Coleoptera	50.2126
H.larvatus	Non_repro	Hemiptera	12.6044
H.larvatus	Post_lactating	Lepidoptera	43.6088
H.larvatus	Post_lactating	Coleoptera	46.3912
H.larvatus	Non_repro	Lepidoptera	29.2396
H.larvatus	Non_repro	Coleoptera	50.9738
H.larvatus	Non_repro	Diptera	18.2668
H.larvatus	Non_repro	Hymenoptera	13.2627
H.larvatus	Non_repro	Hemiptera	4.80534
R.coelophyllus	Post_lactating	Coleoptera	79.984
R.coelophyllus	Post_lactating	Diptera	10.016
R.refulgens	Non_repro	Coleoptera	48.4461
R.refulgens	Non_repro	Lepidoptera	41.5539
R.refulgens	Non_repro	Coleoptera	53.7985
R.refulgens	Non_repro	Diptera	4.92351
R.refulgens	Non_repro	Lepidoptera	35.7576
R.refulgens	Post_lactating	Coleoptera	41.1681
R.refulgens	Post_lactating	Diptera	4.38447
R.refulgens	Post_lactating	Lepidoptera	48.4461
R.refulgens	Post_lactating	Hemiptera	1.65579
R.refulgens	Post_lactating	Coleoptera	43.8538
R.refulgens	Post_lactating	Lepidoptera	46.1462
R.refulgens	Post_lactating	Coleoptera	90
R.malayanus	Post_lactating	Coleoptera	90
R.malayanus	Post_lactating	Coleoptera	90
R.malayanus	Non_repro	Coleoptera	59.3427
R.malayanus	Non_repro	Lepidoptera	30.6573
R.pusillus	Non_repro	Coleoptera	38.8681
R.pusillus	Non_repro	Diptera	3.98417
R.pusillus	Non_repro	Lepidoptera	50.8492
R.pusillus	Non_repro	Coleoptera	86.3629
R.pusillus	Non_repro	Diptera	3.63707
R.pusillus	Non_repro	Coleoptera	44.7523
R.pusillus	Non_repro	Diptera	3.76979
R.pusillus	Non_repro	Lepidoptera	45
R.pusillus	Non_repro	Coleoptera	90
R.pusillus	Non_repro	Coleoptera	90
H.larvatus	Post_lactating	Lepidoptera	61.3856
H.larvatus	Post_lactating	Coleoptera	27.0223
H.larvatus	Post_lactating	Diptera	4.75816
H.larvatus	Post_lactating	Hemiptera	7.27943
H.larvatus	Post_lactating	Coleoptera	90
H.larvatus	Non_repro	Lepidoptera	37.593
H.larvatus	Non_repro	Coleoptera	48.9187
H.larvatus	Non_repro	Diptera	6.84494
H.larvatus	Non_repro	Hymenoptera	7.50185
H.larvatus	Non_repro	Hemiptera	9.70352
H.larvatus	Non_repro	Lepidoptera	60.7245
H.larvatus	Non_repro	Coleoptera	25.6589
H.larvatus	Non_repro	Diptera	6.69379
H.larvatus	Non_repro	Hemiptera	11.2475
R.refulgens	Non_repro	Coleoptera	90
R.refulgens	Post_lactating	Coleoptera	90
R.malayanus	Non_repro	Coleoptera	90
R.malayanus	Non_repro	Coleoptera	90
R.malayanus	Non_repro	Coleoptera	90
R.pusillus	Post_lactating	Coleoptera	43.2679
R.pusillus	Post_lactating	Diptera	5.24476
R.pusillus	Post_lactating	Lepidoptera	46.2527
R.pusillus	Post_lactating	Coleoptera	58.0519
R.pusillus	Post_lactating	Lepidoptera	31.9481
R.pusillus	Post_lactating	Coleoptera	40.4488
R.pusillus	Post_lactating	Diptera	11.0598
R.pusillus	Post_lactating	Lepidoptera	47.4265
R.pusillus	Post_lactating	Coleoptera	24.2599
R.pusillus	Post_lactating	Diptera	6.06958
R.pusillus	Post_lactating	Lepidoptera	64.8959
R.pusillus	Post_lactating	Coleoptera	50.6739
R.pusillus	Post_lactating	Diptera	2.30477
R.pusillus	Post_lactating	Lepidoptera	39.2315
H.larvatus	Non_repro	Lepidoptera	75.3393
H.larvatus	Non_repro	Coleoptera	9.0811
H.larvatus	Non_repro	Diptera	5.9307
H.larvatus	Non_repro	Hemiptera	9.71398
H.larvatus	Non_repro	Lepidoptera	62.4385
H.larvatus	Non_repro	Coleoptera	26.7973
H.larvatus	Non_repro	Hemiptera	5.96512
H.larvatus	Post_lactating	Lepidoptera	79.916
H.larvatus	Post_lactating	Coleoptera	9.06389
H.larvatus	Post_lactating	Hemiptera	4.36775
R.coelophyllus	Post_lactating	Coleoptera	32.6154
R.coelophyllus	Post_lactating	Diptera	5.58829
R.coelophyllus	Post_lactating	Lepidoptera	56.7891
R.refulgens	Non_repro	Coleoptera	40.3966
R.refulgens	Non_repro	Lepidoptera	49.6034
R.refulgens	Post_lactating	Coleoptera	42.2679
R.refulgens	Post_lactating	Diptera	5.00533
R.refulgens	Post_lactating	Lepidoptera	47.2943
R.malayanus	Non_repro	Coleoptera	62.9732
R.malayanus	Non_repro	Diptera	4.61953
R.malayanus	Non_repro	Lepidoptera	26.5651
R.malayanus	Non_repro	Coleoptera	61.0675
R.malayanus	Non_repro	Diptera	10.6323
R.malayanus	Non_repro	Lepidoptera	26.5651
R.malayanus	Post_lactating	Coleoptera	56.5604
R.malayanus	Post_lactating	Diptera	3.47073
R.malayanus	Post_lactating	Lepidoptera	33.2109
R.pusillus	Post_lactating	Coleoptera	42.7192
R.pusillus	Post_lactating	Diptera	8.08182
R.pusillus	Post_lactating	Lepidoptera	46.1462
R.pusillus	Post_lactating	Coleoptera	45
R.pusillus	Post_lactating	Lepidoptera	45
R.pusillus	Post_lactating	Coleoptera	47.2316
R.pusillus	Post_lactating	Diptera	1.89276
R.pusillus	Post_lactating	Lepidoptera	42.7057
R.pusillus	Post_lactating	Coleoptera	42.3374
R.pusillus	Post_lactating	Diptera	3.24381
R.pusillus	Post_lactating	Lepidoptera	47.3556
R.pusillus	Post_lactating	Hemiptera	2.64809
R.pusillus	Non_repro	Coleoptera	38.4183
R.pusillus	Non_repro	Diptera	6.23227
R.pusillus	Non_repro	Lepidoptera	50.809
R.pusillus	Non_repro	Hymenoptera	2.13393
H.larvatus	Post_lactating	Lepidoptera	54.5533
H.larvatus	Post_lactating	Coleoptera	33.4171
H.larvatus	Post_lactating	Diptera	8.33648
H.larvatus	Post_lactating	Hymenoptera	6.29222
H.larvatus	Post_lactating	Lepidoptera	78.668
H.larvatus	Post_lactating	Diptera	11.332
H.larvatus	Non_repro	Lepidoptera	82.9114
H.larvatus	Non_repro	Coleoptera	1.8259
H.larvatus	Non_repro	Diptera	5.17058
H.larvatus	Non_repro	Hemiptera	4.47633
H.larvatus	Non_repro	Lepidoptera	74.4587
H.larvatus	Non_repro	Coleoptera	12.2942
H.larvatus	Non_repro	Hymenoptera	2.03378
H.larvatus	Non_repro	Hemiptera	9.13204
R.refulgens	Non_repro	Coleoptera	81.4354
R.refulgens	Non_repro	Diptera	8.56459
R.refulgens	Post_lactating	Coleoptera	39.2315
R.refulgens	Post_lactating	Lepidoptera	50.7685
R.refulgens	Post_lactating	Coleoptera	41.5539
R.refulgens	Post_lactating	Lepidoptera	48.4461
R.refulgens	Post_lactating	Coleoptera	46.0468
R.refulgens	Post_lactating	Lepidoptera	43.9532
R.refulgens	Post_lactating	Coleoptera	41.4602
R.refulgens	Post_lactating	Lepidoptera	48.5384
R.malayanus	Post_lactating	Coleoptera	30.6573
R.malayanus	Post_lactating	Lepidoptera	59.3427
R.malayanus	Post_lactating	Coleoptera	38.0567
R.malayanus	Post_lactating	Lepidoptera	51.9433
R.malayanus	Post_lactating	Coleoptera	40.3966
R.malayanus	Post_lactating	Lepidoptera	49.6034
R.malayanus	Non_repro	Coleoptera	36.8699
R.malayanus	Non_repro	Lepidoptera	53.1301
R.pusillus	Post_lactating	Coleoptera	42.7057
R.pusillus	Post_lactating	Lepidoptera	47.2943
R.pusillus	Post_lactating	Coleoptera	90
R.pusillus	Post_lactating	Coleoptera	46.994
R.pusillus	Post_lactating	Diptera	4.14551
R.pusillus	Post_lactating	Lepidoptera	42.7057
R.pusillus	Post_lactating	Coleoptera	39.0102
R.pusillus	Post_lactating	Diptera	3.05315
R.pusillus	Post_lactating	Lepidoptera	50.8238
R.pusillus	Non_repro	Coleoptera	39.1835
R.pusillus	Non_repro	Lepidoptera	50.7685
R.pusillus	Non_repro	Hemiptera	1.64228
H.larvatus	Pregnant	Lepidoptera	74.2605
H.larvatus	Pregnant	Coleoptera	6.99301
H.larvatus	Pregnant	Diptera	13.834
H.larvatus	Pregnant	Hymenoptera	2.28393
R.malayanus	Pregnant	Coleoptera	33.025
R.malayanus	Pregnant	Diptera	33.3963
R.malayanus	Pregnant	Lepidoptera	39.2315
R.malayanus	Pregnant	Coleoptera	90
R.pusillus	Pregnant	Coleoptera	46.4161
R.pusillus	Pregnant	Diptera	10.0725
R.pusillus	Pregnant	Lepidoptera	41.6897
R.pusillus	Pregnant	Hemiptera	2.80803
R.pusillus	Pregnant	Coleoptera	47.2239
R.pusillus	Pregnant	Lepidoptera	42.7747
R.pusillus	Pregnant	Coleoptera	36.2103
R.pusillus	Pregnant	Diptera	22.7199
R.pusillus	Pregnant	Lepidoptera	45
R.pusillus	Pregnant	Hemiptera	2.45955
R.pusillus	Pregnant	Coleoptera	35.5084
R.pusillus	Pregnant	Diptera	25.221
R.pusillus	Pregnant	Lepidoptera	43.8538
R.pusillus	Pregnant	Hemiptera	1.87836
R.pusillus	Non_repro	Coleoptera	44.0954
R.pusillus	Non_repro	Diptera	9.62526
R.pusillus	Non_repro	Lepidoptera	44.2384
R.pusillus	Non_repro	Hemiptera	1.91637

## Sheet: T. melanopogon
Tame		Lep	Col	Dip	Hym	Tri	Hom	Hem	Odo	Eph	Unidentified
Dry season
2021-04-01	GKR 1128, M A
1	% freq	59.7067	7.7514	15.3631	10.8939	0.139665	0.27933	5.09777	0.139665	0.209497	0.418994
	% vol	47.1768	9.94853	18.2838	12.4837	0.507029	0.768226	7.1445	1.92057	0.384113	1.38281
2	GKR 1129, F L
	% freq	83.726	5.0743	3.37079	4.85683			2.75462	0.036245		0.181225
	% vol	61.9012	12.1395	7.04791	10.8854			6.52119	1.00326		0.50163
2021-05-01	GKR 1921, M A
1	% freq	96.618	0.852026	0.478178	1.4867			0.565119
	% vol	78.5882	5.22689	3.09244	9.81513			3.27731
2	GKR 1927, F PL
	% freq	84.8647	2.46451	3.40209	7.44709		0.0535762	1.76802
	% vol	59.4378	7.5502	7.49665	20.1606		0	5.35475
3	GKR 1934, M A
	% freq	86.5912	4.04876	1.08838	6.13844			2.13322
	% vol	67.3446	11.7137	2.71186	12.9567			5.27307
4	GKR 1936, M A
	% freq	98.3465	0.306523	0.664853	0.470578		0.0129517	0.198593
	% vol	80.2036	3.8914	7.14932	5.72398		0.271493	2.76018
5	GKR 1938, F NR
	% freq	84.333	3.74409	5.30716	4.58015		0.109051	1.92657
	% vol	61.3846	10.8077	10.9231	10.4615		0.461538	5.96154
Tame	Wet season
	no Tame captured on wet season

## Sheet: H. larvatus
Hila		Lep	Col	Iso	Dip	Hym	Hem
Dry season
2021-04-01	GKR 1230, F NR
1	% freq	11.4943	84.4828		4.02299
	% vol	10.8974	77.5641		11.5385
2	GKR 1232, F NR
	% freq	69.697	14.4522		0.815851	10.7226	4.31235
	% vol	59.887	19.4601		0.251099	15.0031	5.39862
3	GKR1464, F L
	% freq	56.8493	24.6575			13.0137	5.47945
	% vol	53.6424	19.2053			21.8543	5.29801
4	GKR 1635, M A
	% freq	59.2391	16.8478		7.6087	15.2174	1.08696
	% vol	77.3519	9.7561		6.27178	4.18118	2.43902
5	GKR 1637, M A
	% freq	31.3953	66.2791		2.32558
	% vol	36.3636	61.3636		2.27273
2021-05-01	GKR 1821, F NR
1	% freq	83.9286			10.7143		5.35714
	% vol	79.3103			10.3448		10.3448
2	GKR 1868, F NR
	% freq	99.9029	0.0485437				0.0485437
	% vol	99.0826	0.458716				0.458716
3	GKR1908, F L
	% freq	94.1176	5.88235
	% vol	94.2446	5.7554
4	GKR 1910, F L
	% freq	51.8919	48.1081
	% vol	51.2195	48.7805
5	GKR 1916, M A
	% freq	80.4469	16.7598			2.7933
	% vol	70.9091	10.9091			18.1818
2021-08-01	GKR 2097, F PL
1	% freq	87.9257	9.70072		1.54799		0.825593
	% vol	88.7608	9.2219		1.15274		0.864553
2	GKR 2111, F PL
	% freq	51.8272	43.1894		1.99336		2.99003
	% vol	54.2169	36.1446		4.81928		4.81928
3	GKR 2115, M A
	% freq	42.6415	56.6038	0.377358			0.377358
	% vol	37.931	58.6207	1.72414			1.72414
4	GKR 2121, M A
	% freq	70.21	25.1969		3.28084		1.31234
	% vol	54.8387	30.1075		10.7527		4.30108
5	GKR 2154, F NR
	% freq	96.1214	2.44519		0.0421585		1.39123
	% vol	89.8438	6.25		0.78125		3.125
6	GKR 2209, F NR
	% freq	79.1386	16.9583		1.88425		2.01884
	% vol	58.0645	36.129		1.93548		3.87097
2021-09-01	GKR 2661, F PL
1	% freq	66.879	31.5287		0		1.59236
	% vol	66.8874	31.7881		0		1.3245
2	GKR 2684, F NR
	% freq	96.4329	3.23458		0.0302297		0.302297
	% vol	94.6602	3.8835		0.485437		0.970874
3	GKR 2698, F NR
	% freq	43.6823	28.1588		0.361011	10.8303	16.9675
	% vol	41.4815	26.6667		0.740741	11.8519	19.2593
4	GKR 2713, M A
	% freq	48.062	45.3488				6.58915
	% vol	65.625	28.125				6.25
5	GKR 2726, M A
	% freq	80.7692	18.6813				0.549451
	% vol	83.1169	15.5844				1.2987
6	GKR 2747, F PL
	% freq	98.2935	1.36519				0.341297
	% vol	98.4227	1.26183				0.315457
Wet season
2021-10-01	GKR 2548, M A
1	% freq	25.6966	74.3034
	% vol	34.2466	65.7534
2	GKR 2598, F NR
	% freq	36.1905	59.0476			4.7619
	% vol	43.8596	52.6316			3.50877
3	GKR 2894, F PL
	% freq	47.5728	52.4272
	% vol	48.0519	51.9481
4	GKR 2907, F NR
	% freq	23.8596	60.3509	9.82456	5.26316	0.701754
	% vol	25	44.2308	23.0769	5.76923	1.92308
5	GKR 2920, M A
	% freq	94.7368	5.26316
	% vol	96.6667	3.33333
6	GKR 2942, M A
	% freq	91.3242	7.07763			1.59817
	% vol	77.3585	18.8679			3.77358
2021-11-01	GKR 3014, F PL
1	% freq	77.0642	20.6422	0.688073		1.6055
	% vol	49.7297	48.6486	0.540541		1.08108
2	GKR 3017, M A
	% freq	65.0964	31.4775	3.42612
	% vol	46.4789	42.2535	11.2676
3	GKR 3031, F NR
	% freq	37.2159	56.8182	1.42045	1.70455	2.84091
	% vol	40.1826	51.1416	1.82648	2.73973	4.10959
4	GKR 3076, F PL
	% freq	100
	% vol	100
5	GKR 3130, F NR
	% freq	76.087	18.75	1.3587		3.80435
	% vol	74.7899	16.8067	1.68067		6.72269
2021-12-01	GKR 3012, M A
1	% freq	78.7466	21.2534
	% vol	79.803	20.197
2	GKR 3032, F, NR
	% freq	93.5943	2.4911	1.06762		2.84698
	% vol	93.6709	1.26582	2.53165		2.53165
3	GKR 3033, M A
	% freq	50.1684	38.3838	1.3468	5.05051	5.05051
	% vol	60.7143	23.2143	2.67857	2.67857	10.7143
4	GKR 3035, M A
	% freq	66.3462	28.3654	0.721154		4.56731
	% vol	47.9532	40.9357	0.584795		10.5263
5	GKR 3039, F NR
	% freq	78.5908	20.3252			1.08401
	% vol	84.4156	12.987			2.5974
6	GKR 3090, F PL
	% freq	96.9343	2.48175			0.583942
	% vol	96.1538	2.5641			1.28205
2022-01-01	GKR 3326, F PL
1	% freq	66.3664	30.3303	2.1021	1.2012
	% vol	60	35.5556	2.22222	2.22222
2	GKR 3358, F NR
	% freq	98.4772	0.101523	0.812183		0.609137
	% vol	87.8613	0.578035	6.93642		4.62428
3	GKR 3402, F NR
	% freq	92.8212	4.53401		0.125945	2.51889
	% vol	83.871	6.45161		1.6129	8.06452
4	GKR 3454, F PL
	% freq	96.139		3.861
	% vol	93.5484		6.45161
5	SPB 0044, M A
	% freq	78.7791	16.5698	2.03488		2.61628
	% vol	68.5714	22.8571	2.85714		5.71429
6	SPB 0045, M A
	% freq	88.0899	9.4382	0.674157		1.79775
	% vol	91.2281	5.26316	0.877193		2.63158
2022-02-01	GKR 3557, F P
1	% freq	92.6416	1.48227	5.71731	0.158814
	% vol	80.8743	4.37158	14.2077	0.546448

## Sheet: R. coelophyllus
Rhcoe	Dry season				Col	Dip
2021-04-01	1	GKR1681, F L	Total fragments	% freq	96.0352	3.96476
			Total grids occupied	% volume	93.8815	6.11855
					Col
2021-05-01	1	GKR1875, M A	Total fragments	% freq	100
			Total grids occupied	% volume	100
	2	GKR1880, M A			Col
					100
					100
	3	GKR1874, M A			Col	Dip		Hem
					95.815	3.30396		0.881057
					93.3333	6.04167		0.625
	4	GKR1846, M A			Col	Dip			Tri
					96.9014	2.8169			0.28169
					94.385	4.54545			1.06952
	5	GKR1878, F L			Col	Dip	Lep	Hem
					93.0279	2.98805	0.199203	3.78486
					89.0957	5.31915	0.265957	5.31915
	6	GKR1873, F L			Col	Dip
					96.5854	3.41463
					93.985	6.01504
	7	GKR1872, F L			Col	Dip		Hem
					92.4242	6.9697		0.606061
					89.3204	10.0324		0.647249
	8	GKR1877, F P			Col
					100
					100
	9	GKR1870, F P			Col
					100
					100
	10	GKR1898, F NR			Col	Dip
					99.0625	0.9375
					98.4102	1.58983
2021-08-01	1	GKR2254, M A			Col	Dip		Hem
					88.1944	1.38889		10.4167
					93.5673	2.33918		4.09357
2021-09-01
	1	GKR2675, M A			Col	Dip		Hem
					98.1579	0.789474		1.05263
					99	0.5		0.5
	2	GKR2710, M A			Col	Dip		Hem
					95.0192	3.06513		1.91571
					95.1852	3.7037		1.11111
	3	GKR2686, M A			Col		Lep
					48		52
					45.2055		54.7945
	4	GKR2650, F NR			Col	Dip
					97.7901	2.20994
					98.2517	1.74825
Rhcoe	Wet season
Rhcoe
2021-10-01
1	GKR2890, M A	Col	Dip
	Total fragments	99.2593	0.740741
	Total grids occupied	99.5565	0.443459
2	GKR2912, M A	Col	Dip
	Total fragments	99.8759	0.124069
	Total grids occupied	99.7917	0.208333
3	GKR2909, F PL	Col	Dip
	Total fragments	96.9751	3.02491
	Total grids occupied	92.7273	7.27273
2021-11-01
1	GKR3066, M A	Col	Dip		Lep scales	Hem
	Total fragments	49.5708	0.214592		50	0.214592
	Total grids occupied	71.5232	0.165563		27.8146	0.496689
2021-12-01
1	GKR3084, M A	Col	Dip		Lep scales
	Total fragments	24.6914	0.308642		75
	Total grids occupied	43.2381	0.380952		56.381
2	GKR3081, F PL	Col	Dip		Lep scales
	Total fragments	29.0517	0.948276		70
	Total grids occupied	82.0261	2.28758		15.6863
2022-01-01
1	GKR3248, M A	Col	Dip		Lep scales
	Total fragments	47.9377	0.0622568		52
	Total grids occupied	63.9535	0.166113		35.8804
2	GKR3255, M A	Col	Dip	Lep	Lep scales	Hem
	Total fragments	46.3207	0.349854	0.139942	52	1.1895
	Total grids occupied	46.0317	0.680272	0.453515	51.7007	1.13379
2022-02-01
1	GKR3522,M A	Col	Dip	Lep	Lep scales
	Total fragments	57.7039	4.19843	0.0976378	38
	Total grids occupied	70.4778	4.09556	0.170648	25.256

## Sheet: R. refulgens
Rhre	Dry season
2021-04-01
1	GKR1144, M A	Col
	Total fragments	100
	Total grids occupied	100
2	GKR1527, M A	Col		Lep	Lep scales
	Total fragments	53.7483		0.251479	46
	Total grids occupied	59.5661		0.197239	40.2367
3	GKR1160, M A	Col	Dip	Lep	Lep scales
	Total fragments	52.6415	1.01887	0.339623	46
	Total grids occupied	54.6584	2.79503	0.310559	42.236
4	GKR1166, M A	Col	Dip	Lep	Lep scales
	Total fragments	65.4206	4.25234	0.327103	30
	Total grids occupied	84.1202	3.43348	0.429185	12.0172
5	GKR1210, M A	Col
	Total fragments	100
	Total grids occupied	100
6	GKR1178, F P	Col	Dip
	Total fragments	90.1639	9.83607
	Total grids occupied	94.7761	5.22388
7	GKR1201, F P	Col	Dip
	Total fragments	98.3193	1.68067
	Total grids occupied	98.1567	1.84332
8	GKR1211, F P	Col	Dip
	Total fragments	91.791	8.20896
	Total grids occupied	95.3704	4.62963
9	GKR1220, F P	Col	Dip
	Total fragments	88.2834	11.7166
	Total grids occupied	87.8981	12.1019
10	GKR1217, F P	Col	Dip
	Total fragments	97.4747	2.52525
	Total grids occupied	96.3077	3.69231
2021-05-01
1	GKR1796, M A	Col	Dip
	Total fragments	99.0338	0.966184
	Total grids occupied	98.9848	1.01523
2	GKR1842, F L	Col
	Total fragments	100
	Total grids occupied	100
3	GKR1833, F L	Col
	Total fragments	100
	Total grids occupied	100
4	GKR1770, F L	Col
	Total fragments	100
	Total grids occupied	100
5	GKR1843, F L	Col	Dip
	Total fragments	99.2832	0.716846
	Total grids occupied	99.3769	0.623053
2021-08-01
1	GKR1961, M A	Col	Dip
	Total fragments	99.4987	0.501253
	Total grids occupied	99.6667	0.333333
2	GKR1963, M A	Col
	Total fragments	100
	Total grids occupied	100
3	GKR1973, M A	Col	Dip
	Total fragments	94.8864	5.11364
	Total grids occupied	91.3043	8.69565
4	GKR1993, M A	Col	Dip
	Total fragments	99.1329	0.867052
	Total grids occupied	99.67	0.330033
5	GKR2046, M A	Col
	Total fragments	100
	Total grids occupied	100
6	GKR1977, F NR	Col	Dip
	Total fragments	98.5915	1.40845
	Total grids occupied	99.2278	0.772201
7	GKR1989, F NR	Col
	Total fragments	100
	Total grids occupied	100
8	GKR1984, F PL	Col	Dip
	Total fragments	99.7067	0.293255
	Total grids occupied	99.5951	0.404858
9	GKR2033, F PL	Col	Dip		Lep scales
	Total fragments	49.3976	0.60241		50
	Total grids occupied	52.1127	2.8169		45.0704
10	GKR2075, F PL	Col	Dip
	Total fragments	99.0361	0.963855
	Total grids occupied	99.2908	0.70922
2021-09-01
1	GKR2725, M A	Col	Dip			Hem
	Total fragments	70.3226	13.871			15.8065
	Total grids occupied	65.9884	22.093			11.9186
2	GKR2755, M A	Col	Dip
	Total fragments	83.592	16.408
	Total grids occupied	92.1769	7.82313
3	GKR2662, M A	Col	Dip			Hem
	Total fragments	82.2014	17.3302			0.468384
	Total grids occupied	92.4528	7.00809			0.539084
4	GKR2765, M A	Col	Dip
	Total fragments	91.2338	8.76623
	Total grids occupied	95.9322	4.0678
5	GKR2807, F PL	Col	Dip			Hem
	Total fragments	82.5688	16.5138			0.917431
	Total grids occupied	90.0875	9.0379			0.874636
Rhre	Wet season
2021-10-01
1	GKR2527, M A	Col	Dip
	Total fragments	96.73	3.27004
	Total grids occupied	88.8325	11.1675
2	GKR2528, M A	Col	Dip	Lep	Lep scales
	Total fragments	38.9697	0.666667	0.363636	60
	Total grids occupied	67.6856	0.436681	0.436681	31.441
3	GKR2540, M A	Col	Dip		Lep scales
	Total fragments	78.1481	1.85185		20
	Total grids occupied	95.0156	1.24611		3.73832
4	GKR2544, M A	Col	Dip		Lep scales
	Total fragments	49.0876	0.912409		50
	Total grids occupied	91.2807	1.08992		7.62943
5	GKR2858, M A	Col
	Total fragments	100
	Total grids occupied	100
6	GKR2532, F NR	Col			Lep scales
	Total fragments	56			44
	Total grids occupied	75.3846			24.6154
7	GKR2543, F NR	Col	Dip	Lep	Lep scales
	Total fragments	65.1161	0.736607	0.147321	34
	Total grids occupied	69.8734	1.51899	0.253165	28.3544
8	GKR2541, F PL	Col	Dip		Lep scales	Hem
	Total fragments	43.3321	0.58444		56	0.0834915
	Total grids occupied	67.2727	0.454545		32.1212	0.151515
9	GKR2883, F PL	Col			Lep scales
	Total fragments	48			52
	Total grids occupied	66.5914			33.4086
10	GKR2893, F PL	Col
	Total fragments	100
	Total grids occupied	100
2021-11-01
1	GKR2999, M A	Col
	Total fragments	100
	Total grids occupied	100
2	GKR3037, M A	Col			Lep scales
	Total fragments	58			42
	Total grids occupied	72.0137			27.9863
3	GKR3050, M A	Col	Dip		Lep scales
	Total fragments	79.8453	0.154739		20
	Total grids occupied	15.0943	84.1509		0.754717
4	GKR3051, M A	Col
	Total fragments	100
	Total grids occupied	100
5	GKR3054, M A	Col
	Total fragments	100
	Total grids occupied	100
6	GKR3062, M A	Col
	Total fragments	100
	Total grids occupied	100
7	GKR3068, F NR	Col
	Total fragments	100
	Total grids occupied	100
8	GKR2987, F PL	Col
	Total fragments	100
	Total grids occupied	100
2021-12-01
1	GKR3016, M A	Col			Lep scales
	Total fragments	52			48
	Total grids occupied	70			30
2	GKR3024, M A	Col			Lep scales
	Total fragments	54			46
	Total grids occupied	68.4211			31.5789
3	GKR3025, M A	Col			Lep scales
	Total fragments	42			58
	Total grids occupied	65.5			34.5
4	GKR3026, M A	Col			Lep scales
	Total fragments	40			60
	Total grids occupied	61.5267			38.4733
5	GKR3093, M A	Col			Lep scales
	Total fragments	48			52
	Total grids occupied	66.0131			33.9869
6	GKR3042, F NR	Col			Lep scales
	Total fragments	42			58
	Total grids occupied	64.486			35.514
7	GKR3011, F PL	Col	Dip		Lep scales
	Total fragments	45.2388	0.761229		54
	Total grids occupied	59.919	2.83401		37.247
2022-01-01
1	GKR3294, M A	Col			Lep scales
	Total fragments	46			54
	Total grids occupied	63.1399			36.8601
2	GKR3283, M A	Col				Hem
	Total fragments	97.4903				2.50965
	Total grids occupied	97.561				2.43902
3	GKR3265, M A	Col			Lep scales
	Total fragments	36			66
	Total grids occupied	43.6242			56.3758
4	GKR3410, M A	Col		Lep	Lep scales
	Total fragments	43.8456		0.154386	56
	Total grids occupied	56.6929		0.262467	43.0446
5	GKR3413, M A	Col			Lep scales
	Total fragments	54			46
	Total grids occupied	65.283			34.717
6	GKR3359, F NR	Col	Dip
	Total fragments	97.7822	2.21784
	Total grids occupied	94.7368	5.26316
7	GKR3277, F PL	Col			Lep scales
	Total fragments	40			60
	Total grids occupied	59.8886			40.1114
8	GKR3278, F PL	Col			Lep scales
	Total fragments	44			56
	Total grids occupied	59.2982			40.7018
9	GKR3394, F PL	Col		Lep	Lep scales
	Total fragments	51.8267		0.173333	48
	Total grids occupied	57.0796		0.442478	42.4779
10	GKR3296, F PL	Col		Lep	Lep scales
	Total fragments	43.8376		0.162362	56
	Total grids occupied	63.4304		0.323625	36.246

## Sheet: R. malayanus
Rhmal	Dry season
2021-04-01
1	GKR1241, M A	Col
	Total fragments	100
	Total grids occupied	100
2	GKR1486, M A	Col
	Total fragments	100
	Total grids occupied	100
3	GKR1495, M A	Col	Dip	Lep
	Total fragments	89.6875	3.125	7.1875
	Total grids occupied	85.5705	10.0671	4.36242
4	GKR1700, M A	Col	Dip	Lep	Lep scales
	Total fragments	60.5714	6	3.42857	30
	Total grids occupied	59.8572	8.23723	1.92202	29.9835
5	GKR1710, M A	Col	Dip
	Total fragments	87.2774	12.7226
	Total grids occupied	78.0538	21.9462
6	GKR1475, F P	Col
	Total fragments	100
	Total grids occupied	100
7	GKR1499, F P	Col
	Total fragments	100
	Total grids occupied	100
8	GKR1704, F P	Col
	Total fragments	100
	Total grids occupied	100
9	GKR1529, F P	Col
	Total fragments	100
	Total grids occupied	100
10	GKR1487, F L	Col
	Total fragments	100
	Total grids occupied	100
2021-05-01
1	GKR1906, M A	Col	Dip	Lep	Lep scales
	Total fragments	14.0935	0.485981	37.4206	48
	Total grids occupied	6.92905	1.38581	15.5211	76.1641
2	GKR1812, F L	Col	Dip
	Total fragments	86.1111	13.8889
	Total grids occupied	54.8387	45.1613
3	GKR1854, F L	Col
	Total fragments	100
	Total grids occupied	100
4	GKR1859, F L	Col
	Total fragments	100
	Total grids occupied	100
2021-08-01
1	GKR1956, M A	Col		Lep	Lep scales
	Total fragments	14.875		19.125	66
	Total grids occupied	5.64516		4.43548	89.9194
2	GKR1952, M A	Col		Lep	Lep scales
	Total fragments	19.2667		14.7333	66
	Total grids occupied	2.28172		1.21692	96.5014
3	GKR1962, M A	Col	Dip
	Total fragments	99.2395	0.760456
	Total grids occupied	98.6928	1.30719
4	GKR1955, M A	Col			Lep scales
	Total fragments	42			58
	Total grids occupied	36.714			63.286
5	GKR1954, M A	Col		Lep	Lep scales
	Total fragments	55.8515		0.148541	44
	Total grids occupied	49.0358		0.275482	50.6887
6	GKR2028, F NR	Col		Lep	Lep scales
	Total fragments	59.1379		10.8621	30
	Total grids occupied	50.6849		8.21918	41.0959
2021-09-01
1	GKR2787, M A	Col	Dip
	Total fragments	89.8551	10.1449
	Total grids occupied	76.3441	23.6559
2	GKR2659, M A	Col
	Total fragments	100
	Total grids occupied	100
3	SPC0041, M A	Col	Dip
	Total fragments	91.9355	8.06452
	Total grids occupied	87.1429	12.8571
4	GKR2721, M A	Col	Dip
	Total fragments	89.9083	10.0917
	Total grids occupied	75	25
5	GKR2718, M A	Col	Dip
	Total fragments	95.6332	4.36681
	Total grids occupied	90.6977	9.30233
6	GKR2676, M A	Col
	Total fragments	100
	Total grids occupied	100
7	GKR2717, F PL	Col	Dip
	Total fragments	53.7037	46.2963
	Total grids occupied	59.0909	40.9091
8	GKR2741, F PL	Col	Dip				Hym
	Total fragments	42.0168	57.1429				0.840336
	Total grids occupied	34.192	63.9344				1.87354
9	GKR2733, F PL	Col	Dip			Hem		Odo
	Total fragments	62.3656	6.45161			29.0323		2.15054
	Total grids occupied	49.8099	18.251			11.4068		20.5323
10	GKR2688, F PL	Col	Dip			Hem
	Total fragments	86.5801	7.35931			6.06061
	Total grids occupied	84.0125	12.5392			3.44828
Rhmal	Wet season
2021-10-01
1	GKR2967, M A	Col	Dip
	Total fragments	96.0422	3.95778
	Total grids occupied	97.0027	2.99728
2	GKR2596, M A	Col
	Total fragments	100
	Total grids occupied	100
3	GKR2862, M A	Col
	Total fragments	100
	Total grids occupied	100
4	GKR2963, M A	Col			Lep scales
	Total fragments	80			20
	Total grids occupied	88.4058			11.5942
5	GKR2965, M A	Col
	Total fragments	100
	Total grids occupied	100
6	GKR2566, F PL	Col
	Total fragments	100
	Total grids occupied	100
7	GKR2933, F PL	Col
	Total fragments	100
	Total grids occupied	100
8	GKR2915, F NR	Col			Lep scales
	Total fragments	74			26
	Total grids occupied	77.4011			22.5989
2021-11-01
1	GKR3029, M A	Col
	Total fragments	100
	Total grids occupied	100
2	GKR3030, M A	Col
	Total fragments	100
	Total grids occupied	100
3	GKR3056, M A	Col
	Total fragments	100
	Total grids occupied	100
4	GKR3091, M A	Col	Dip			Hem
	Total fragments	98.289	1.3308			0.380228
	Total grids occupied	97.7974	1.98238			0.220264
5	GKR3093, M A	Col	Dip
	Total fragments	97.7273	2.27273
	Total grids occupied	96.4286	3.57143
6	GKR3096, M A	Col	Dip		Lep scales
	Total fragments	79.3878	0.612245		20
	Total grids occupied	93.0622	2.15311		4.78469
7	GKR3098, M A	Col	Dip
	Total fragments	90.1929	9.80707
	Total grids occupied	82.346	17.654
8	GKR3055, F NR	Col
	Total fragments	100
	Total grids occupied	100
9	GKR3061, F NR	Col
	Total fragments	100
	Total grids occupied	100
10	GKR3170, F NR	Col
	Total fragments	100
	Total grids occupied	100
2021-12-01
1	GKR3049, M A	Col	Dip
	Total fragments	99.1643	0.835655
	Total grids occupied	99.1935	0.806452
2	GKR3054, M A	Col	Dip
	Total fragments	99.1228	0.877193
	Total grids occupied	98.7013	1.2987
3	GKR3057, M A	Col	Dip
	Total fragments	93.75	6.25
	Total grids occupied	89.1473	10.8527
4	GKR3058, M A	Col	Dip		Lep scales
	Total fragments	59.162	0.837989		40
	Total grids occupied	92.1109	1.0661		6.82303
5	GKR3074, M A	Col	Dip
	Total fragments	81.3725	18.6275
	Total grids occupied	72.5	27.5
6	GKR3079, M A	Col
	Total fragments	100
	Total grids occupied	100
7	GKR3087, M A	Col	Dip
	Total fragments	98.5163	1.48368
	Total grids occupied	99.6914	0.308642
8	GKR3050, F NR	Col	Dip		Lep scales
	Total fragments	79.3514	0.648649		20
	Total grids occupied	94.697	0.757576		4.54545
9	GKR3085, F NR	Col	Dip		Lep scales
	Total fragments	76.5957	3.40426		20
	Total grids occupied	75.7812	2.34375		21.875
10	GKR3088, F PL	Col	Dip		Lep scales
	Total fragments	69.6335	0.366492		30
	Total grids occupied	76.0181	0.452489		23.5294
2022-01-01
1	GKR3267, M A	Col			Lep scales
	Total fragments	40			60
	Total grids occupied	62.5731			37.4269
2	GKR3272, M A	Col	Dip			Hem
	Total fragments	93.6123	1.10132			5.28634
	Total grids occupied	95.3069	1.80505			2.88809
3	GKR3273, F PL	Col			Lep scales
	Total fragments	26			74
	Total grids occupied	9.02527			90.9747
4	GKR3304, F PL	Col			Lep scales
	Total fragments	38			62
	Total grids occupied	12.3675			87.6325
5	GKR3311, F PL	Col			Lep scales
	Total fragments	42			58
	Total grids occupied	66.4884			33.5116
6	GKR3349, F NR	Col			Lep scales
	Total fragments	36			64
	Total grids occupied	6.84932			93.1507
2022-02-01
1	GKR3544, M A	Col	Dip	Lep	Lep scales
	Total fragments	48.7603	1.07438	0.165289	50
	Total grids occupied	70.2586	1.72414	0.431034	27.5862
2	GKR3536, M A	Col	Dip
	Total fragments	99.1708	0.829187
	Total grids occupied	99.3684	0.631579
3	GKR3556, F P	Col	Dip		Lep scales
	Total fragments	29.703	30.297		40
	Total grids occupied	23.6515	30.3734		9.95851
4	GKR3516, F P	Col
	Total fragments	100
	Total grids occupied	100

## Sheet: R. pusillus
Rhpu	Dry season
2021-04-01
1	GKR1503, M A	Col	Dip		Lep scales	Hem
	Total fragments	49.3915	0.507099		50	0.10142
	Total grids occupied	65.1429	1.14286		33.5238	0.190476
2	GKR1512, M A	Col	Dip	Lep	Lep scales
	Total fragments	40.6	0.538462	0.861538	58
	Total grids occupied	45.1493	1.30597	0.559701	52.9851
3	GKR1175, M A	Col	Dip			Hem
	Total fragments	98.5232	1.26582			0.21097
	Total grids occupied	98.7382	0.946372			0.315457
4	GKR1674, M A	Col	Dip		Lep scales	Hem	Hym
	Total fragments	45.5229	1.20857		53	0.134286	0.134286
	Total grids occupied	56.5292	1.89003		41.2371	0.171821	0.171821
5	GKR1639, M A	Col	Dip
	Total fragments	98.5014	1.49864
	Total grids occupied	98.7179	1.28205
6	GKR1184, F P	Col	Dip		Lep scales
	Total fragments	69.2015	0.798479		30
	Total grids occupied	75.974	0.649351		23.3766
7	GKR1216, F P	Col	Dip		Lep scales	Hem
	Total fragments	49.2654	4.60664		46	0.127962
	Total grids occupied	57.8824	2.35294		39.5294	0.235294
8	GKR1687, F P	Col	Dip	Lep	Lep scales	Hem	Hym
	Total fragments	52	5.68421	0.842105	40	1.05263	0.421053
	Total grids occupied	54.4843	7.84753	0.672646	35.8744	0.896861	0.224215
9	GKR1191, F P	Col	Dip			Hem
	Total fragments	95.1389	3.93519			0.925926
	Total grids occupied	93.3824	5.88235			0.735294
10	GKR1199, F P	Col	Dip
	Total fragments	97.3577	2.64228
	Total grids occupied	94.8649	5.13514
2021-05-01
1	GKR1807, M A	Col	Dip
	Total fragments	98.8732	1.12676
	Total grids occupied	99.0099	0.990099
2	GKR1810, M A	Col
	Total fragments	100
	Total grids occupied	100
3	GKR1815, M A	Col	Dip	Lep	Lep scales
	Total fragments	49.7162	1.75676	0.527027	48
	Total grids occupied	52.9954	2.07373	0.691244	44.2396
4	GKR1816, M A	Col
	Total fragments	100
	Total grids occupied	100
5	GKR1882, M A	Col	Dip		Lep scales
	Total fragments	29.9279	0.0721154		70
	Total grids occupied	50	0.153846		49.8462
6	GKR1773, F L	Col	Dip
	Total fragments	99.7706	0.229358
	Total grids occupied	99.4186	0.581395
7	GKR1774, F L	Col
	Total fragments	100
	Total grids occupied	100
8	GKR1808, F L	Col
	Total fragments	100
	Total grids occupied	100
9	GKR1841, F L	Col
	Total fragments	100
	Total grids occupied	100
10	GKR1915, F L	Col	Dip	Lep	Lep scales
	Total fragments	34.5752	1.23483	0.189974	64
	Total grids occupied	52.8716	0.844595	0.337838	45.9459
2021-08-01
1	GKR2041, M A	Col	Dip		Lep scales
	Total fragments	51.5772	0.422764		48
	Total grids occupied	54.5455	0.606061		44.8485
2	GKR2124, M A	Col	Dip
	Total fragments	98.0488	1.95122
	Total grids occupied	97.0684	2.9316
3	GKR2127, M A	Col	Dip		Lep scales	Hem
	Total fragments	57.9661	1.45278		40	0.581114
	Total grids occupied	77.665	2.28426		19.2893	0.761421
4	GKR2141, M A		Col		Lep scales	Hem
	Total fragments		49.8677		50	0.132275
	Total grids occupied		50.7435		49.0706	0.185874
5	GKR2058, M A	Col			Lep scales
	Total fragments	50			50
	Total grids occupied	89.9244			10.0756
6	GKR1974, F PL	Col	Dip	Lep	Lep scales
	Total fragments	47.956	0.157233	1.88679	50
	Total grids occupied	50	0.320513	0.961538	48.7179
7	GKR1985, F PL	Col	Dip	Lep	Lep scales
	Total fragments	47.1854	1.65563	1.15894	50
	Total grids occupied	55.0562	2.69663	0.898876	41.3483
8	GKR1986, F PL	Col			Lep scales
	Total fragments	36			64
	Total grids occupied	53.3333			46.6667
9	GKR2177, F PL	Col	Dip		Lep scales	Hem
	Total fragments	47.5336	0.896861		50	1.56951
	Total grids occupied	20.904	1.12994		76.8362	1.12994
10	GKR2178, F PL	Col	Dip
	Total fragments	99.0654	0.934579
	Total grids occupied	97.8979	2.1021
2021-09-01
1	GKR2648, M A	Col			Lep scales
	Total fragments	48			52
	Total grids occupied	59.8361			40.1639
2	GKR2693, M A	Col	Dip		Lep scales	Hem
	Total fragments	42.5797	2.24104		55	0.179283
	Total grids occupied	61.2319	1.63043		36.9565	0.181159
3	GKR2734, M A	Col	Dip		Lep scales
	Total fragments	45.665	0.334951		54
	Total grids occupied	54.9884	0.464037		44.5476
4	GKR2673, M A	Col
	Total fragments	100
	Total grids occupied	100
5	GKR2807, M A	Col	Dip
	Total fragments	99.031	0.968992
	Total grids occupied	98.0645	1.93548
6	GKR2635, F NR	Col	Dip		Lep scales
	Total fragments	51.9251	0.074928		48
	Total grids occupied	63.5838	0.578035		35.8382
7	GKR2664, F NR	Col			Lep scales	Hem
	Total fragments	47.4519			52	0.548124
	Total grids occupied	56.6667			42.8571	0.47619
8	GKR2701, F NR	Col	Dip		Lep scales
	Total fragments	45.6128	0.387205		54
	Total grids occupied	58.9552	0.746269		40.2985
9	GKR2707, F NR	Col	Dip	Lep	Lep scales	Hem
	Total fragments	58.087	1.13043	0.608696	40	0.173913
	Total grids occupied	66.2125	1.63488	1.3624	30.5177	0.27248
10	GKR2714, F NR	Col	Dip	Lep	Lep scales
	Total fragments	57.6417	3.65533	0.702948	38
	Total grids occupied	62.6812	3.26087	0.724638	33.3333
Rhpu	Wet season
2021-10-01
1	GKR2524, M A	Col	Dip		Lep scales	Hem
	Total fragments	77.0076	0.59542		22	0.396947
	Total grids occupied	80.2013	0.671141		18.7919	0.33557
2	GKR2526, M A	Col			Lep scales
	Total fragments	76			24
	Total grids occupied	79.288			20.712
3	GKR1674, M A	Col	Dip		Lep scales
	Total fragments	77.5362	2.46377		20
	Total grids occupied	79.8883	3.35196		16.7598
4	GKR2531, M A	Col	Dip		Lep scales
	Total fragments	75.7983	4.20168		20
	Total grids occupied	78.853	2.50896		18.638
5	GKR2536, M A	Col	Dip
	Total fragments	90.3409	9.65909
	Total grids occupied	95.6311	4.36893
6	GKR2521, F NR	Col	Dip	Lep	Lep scales
	Total fragments	39.3793	0.482759	0.137931	60
	Total grids occupied	63.7795	0.393701	0.393701	35.4331
7	GKR2523, F NR	Col	Dip
	Total fragments	99.5976	0.402414
	Total grids occupied	99.5025	0.497512
8	GKR2529, F NR	Col	Dip		Lep scales
	Total fragments	49.5677	0.432277		50
	Total grids occupied	35.3627	0.129534		29.0155
9	GKR2533, F NR	Col
	Total fragments	100
	Total grids occupied	100
10	GKR2565, F NR	Col
	Total fragments	100
	Total grids occupied	100
2021-11-01
1	GKR2993, M A	Col	Dip	Lep	Lep scales	Hem
	Total fragments	45.1466	0.682746	0.0853432	54	0.0853432
	Total grids occupied	64.8649	0.900901	0.18018	33.8739	0.18018
2	GKR2970, M A	Col	Dip	Lep	Lep scales
	Total fragments	45.7867	0.142195	0.0710974	54
	Total grids occupied	69.3878	0.204082	0.204082	30.2041
3	GKR2976, M A	Col	Dip	Lep	Lep scales
	Total fragments	49.3956	0.10989	0.494505	50
	Total grids occupied	69.5652	0.5997	0.449775	29.3853
4	GKR2982, M A	Col			Lep scales
	Total fragments	48			52
	Total grids occupied	75.3467			24.6533
5	GKR2989, M A	Col		Lep	Lep scales
	Total fragments	49.8252		0.174825	50
	Total grids occupied	78.5498		0.302115	21.148
6	GKR2985, F PL	Col	Dip	Lep	Lep scales
	Total fragments	46.9787	0.83559	0.185687	52
	Total grids occupied	61.7778	0.666667	0.222222	37.3333
7	GKR2992, F PL	Col			Lep scales
	Total fragments	72			28
	Total grids occupied	79.6875			20.3125
8	GKR2997, F PL	Col	Dip	Lep	Lep scales
	Total fragments	42.09	3.68	0.23	54
	Total grids occupied	59.699	3.84615	0.334448	36.1204
9	GKR3000, F PL	Col	Dip		Lep scales
	Total fragments	16.882	1.11801		82
	Total grids occupied	19.3548	1.38249		79.2627
10	GKR3013, F PL	Col	Dip		Lep scales
	Total fragments	59.8383	0.161725		40
	Total grids occupied	71.5953	0.389105		28.0156
2021-12-01
1	GKR3001, M A	Col	Dip		Lep scales
	Total fragments	37.9237	0.0763052		62
	Total grids occupied	58.1395	0.581395		41.2791
2	GKR3003, M A	Col	Dip	Lep	Lep scales
	Total fragments	47.1603	0.349854	0.489796	52
	Total grids occupied	67.5	0.735294	0.588235	31.1765
3	GKR3007, M A	Col	Dip	Lep	Lep scales
	Total fragments	48.6181	0.879397	0.502513	50
	Total grids occupied	62.5571	0.684932	0.228311	36.5297
4	GKR3009, M A	Col			Lep scales
	Total fragments	42			58
	Total grids occupied	64.6018			35.3982
5	GKR3010, M A	Col	Dip	Lep	Lep scales
	Total fragments	41.4362	0.375839	0.187919	58
	Total grids occupied	66.8776	1.47679	0.421941	31.2236
6	GKR3002, F PL	Col	Dip		Lep scales
	Total fragments	46.0235	1.97647		52
	Total grids occupied	61.0825	1.80412		37.1134
7	GKR3004, F PL	Col			Lep scales
	Total fragments	50			50
	Total grids occupied	72			28
8	GKR3018, F PL	Col	Dip		Lep scales
	Total fragments	53.8909	0.109091		46
	Total grids occupied	63.9423	0.480769		35.5769
9	GKR3089, F PL	Col	Dip	Lep	Lep scales	Hem
	Total fragments	45.3596	0.320186	0.106729	54	0.213457
	Total grids occupied	62.5352	0.84507	0.28169	36.0563	0.28169
10	GKR3028, F NR	Col	Dip	Lep	Lep scales		Hym
	Total fragments	38.6135	1.17851	0.0693241	60		0.138648
	Total grids occupied	68.4458	1.56986	0.156986	28.8854		0.941915
2022-01-01
1	GKR3307, M A	Col		Lep	Lep scales
	Total fragments	37.7738		0.22619	62
	Total grids occupied	43.5606		0.378788	56.0606
2	GKR3323, M A	Col			Lep scales
	Total fragments	47			53
	Total grids occupied	73.9496			26.0504
3	GKR3334, M A	Col			Lep scales
	Total fragments	60			40
	Total grids occupied	69.5502			30.4498
4	GKR3353, M A	Col		Lep	Lep scales
	Total fragments	39.5376		0.462428	60
	Total grids occupied	36.8794		0.70922	62.4113
5	GKR, M A	Col			Lep scales
	Total fragments	48			52
	Total grids occupied	69.863			30.137
6	GKR3354, F PL	Col			Lep scales
	Total fragments	46			54
	Total grids occupied	61.9048			38.0952
7	GKR3357, F PL	Col
	Total fragments	100
	Total grids occupied	100
8	GKR3380, F PL	Col	Dip		Lep scales
	Total fragments	53.4774	0.522581		46
	Total grids occupied	66.2162	2.7027		31.0811
9	GKR3392, F PL	Col	Dip	Lep	Lep scales
	Total fragments	39.6217	0.283688	0.0945626	60
	Total grids occupied	61.9883	1.16959	0.194932	36.6472
10	GKR3409, F NR	Col			Lep scales	Hem
	Total fragments	39.9179			60	0.0821355
	Total grids occupied	64.0964			35.6627	0.240964
2022-02-01
1	GKR3514, M A	Col			Lep scales
	Total fragments	46			54
	Total grids occupied	66.1972			33.8028
2	GKR3515, M A	Col		Lep	Lep scales		Hym
	Total fragments	51.52		0.4	48		0.08
	Total grids occupied	68.3616		0.376648	59.9752		0.376648
3	GKR3517, M A	Col	Dip		Lep scales
	Total fragments	39.9083	0.0917431		60
	Total grids occupied	57.5139	0.185529		42.3006
4	GKR3518, M A	Col	Dip		Lep scales
	Total fragments	39.5	0.5		60
	Total grids occupied	47.2303	0.291545		52.4781
5	GKR3521, M A	Col	Dip		Lep scales
	Total fragments	40.8073	7.19266		52
	Total grids occupied	56.8123	4.11311		39.0746
6	GKR3520, F P	Col	Dip	Lep	Lep scales	Hem
	Total fragments	52.4706	3.05882	0.235294	44	0.235294
	Total grids occupied	69.3182	2.27273	0.852273		0.284091
7	GKR3529, F P	Col		Lep	Lep scales
	Total fragments	53.8776		0.122449	46
	Total grids occupied	68.2594		0.341297	31.3993
8	GKR3537, F P	Col	Dip		Lep scales	Hem
	Total fragments	34.8987	14.9171		50	0.184162
	Total grids occupied	52.2968	12.8975		34.629	0.176678
9	GKR3551, F P	Col	Dip		Lep scales	Hem
	Total fragments	33.7355	18.157		48	0.107438
	Total grids occupied	48	16.9412		34.8235	0.235294
10	GKR3527, F NR	Col	Dip	Lep	Lep scales	Hem
	Total fragments	48.4215	2.7957	0.670968	48	0.111828
	Total grids occupied	62.7451	3.92157	1.63399	31.3725	0.326797
